# Supplementary material for: Statistical evaluation to validate matrix-matched calibration for standardized beany odor compound quantitation in yellow pea flour using HS-SPME-GC-MS
Source: Royal Society of Chemistry journal article supplement (doi:10.1039/d2fo00050d), 2022-01-01
Supplement: d2fo00050d1.pdf [file d2fo00050d1.pdf]

1 **Supplementary material**

2

3

4 **Statistical Evaluation to Validate Matrix-Matched Calibration for**  
5 **Standardized Beany Odor Compounds Quantitation in Yellow Pea Flour**  
6 **Using HS-SPME-GC-MS**

7 **Zixuan Gu <sup>a</sup>, Xiao Chen <sup>b</sup>, Jiajia Rao <sup>a</sup>, Bingcan Chen <sup>a\*</sup>**

8 <sup>a</sup>. *Department of Plant Sciences, North Dakota State University, Fargo, North Dakota 58108, United*  
9 *States*

10 <sup>b</sup>. *School of Chemical Sciences, The University of Auckland, Auckland 1010, New Zealand*

11

12 Manuscript submitted to: *Food & Function*

13

14

15

16

---

\* To whom correspondence should be addressed. Tel. (701) 231-9450, e-mail: [bingcan.chen@ndsu.edu](mailto:bingcan.chen@ndsu.edu)

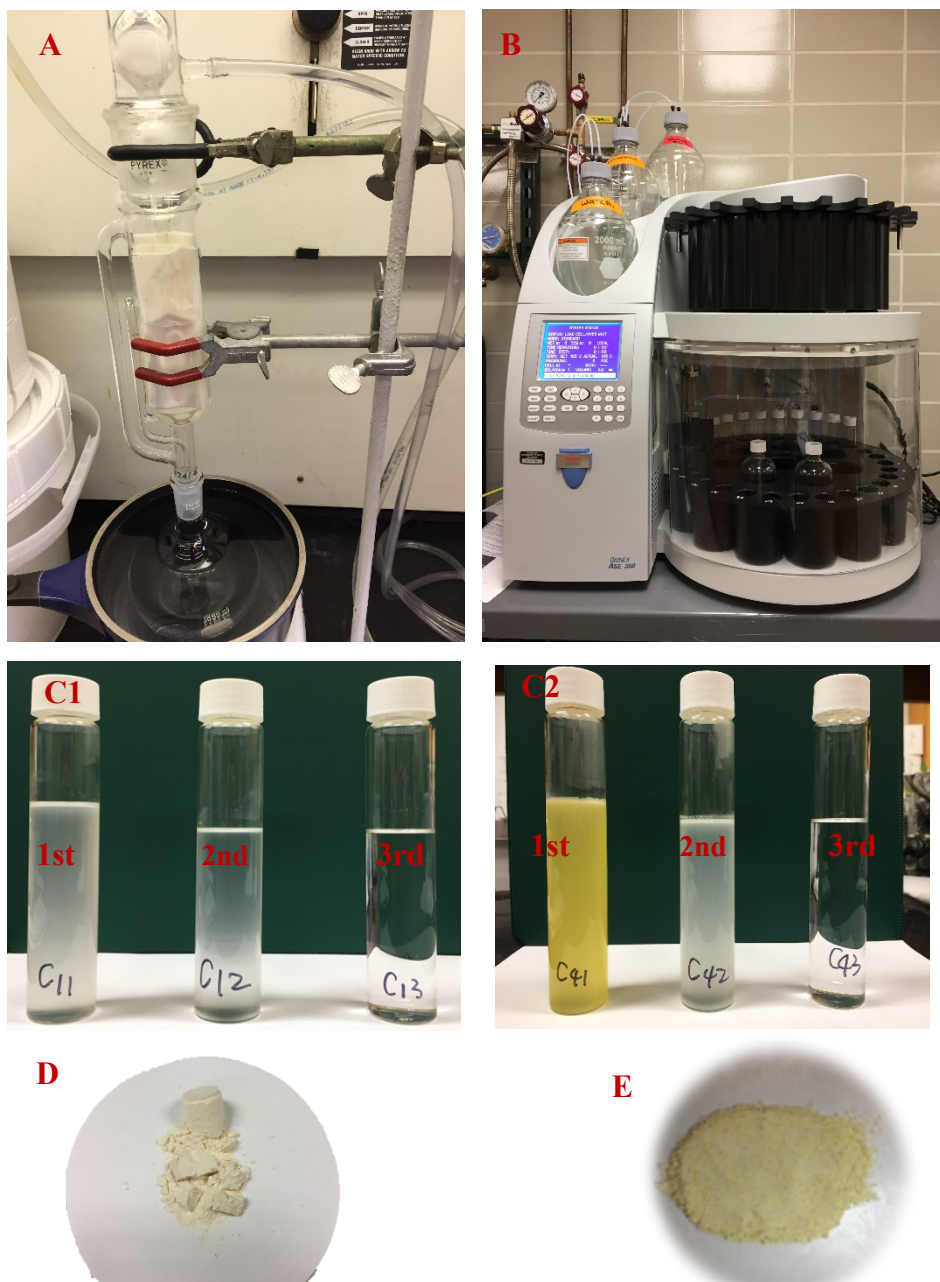

17 **1. Figures and tables**

18 Fig. S1 (A) Soxhlet extraction, (B) Accelerated dichloromethane extraction (ASEDCM),

19 Raffinate from (C1) three-cycle of accelerated dichloromethane extraction of starch & (C2)

20 three-cycle of accelerated dichloromethane extraction of yellow pea, (D) Deodorized matrix-

21 matched yellow pea flour from accelerated dichloromethane extraction (ASEDCMYP), and

22 (E) Native yellow pea flour.

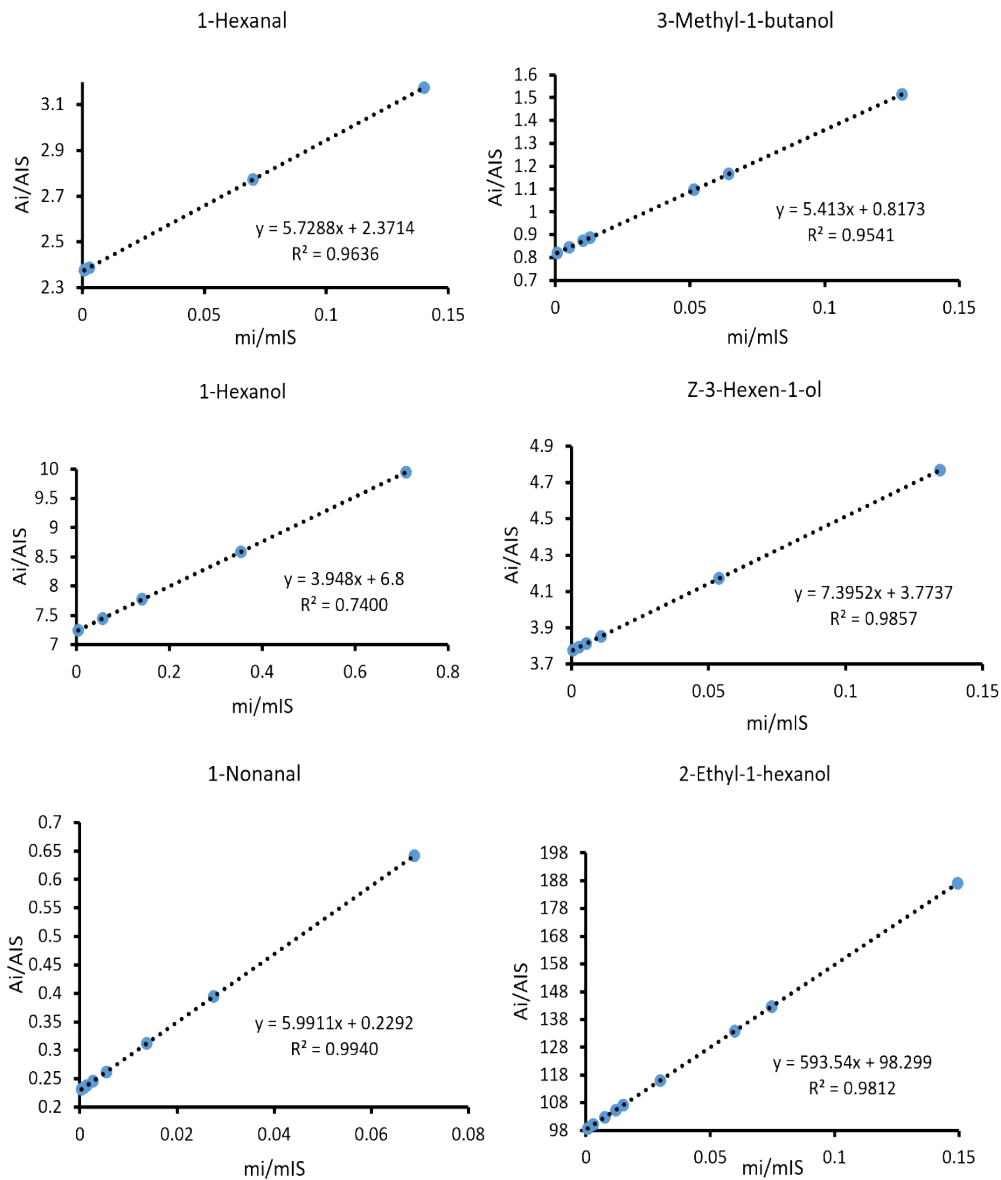

25 Fig. S2 External standard calibration curves of six beany odor makers established in methanol

26 via weighted least square regression

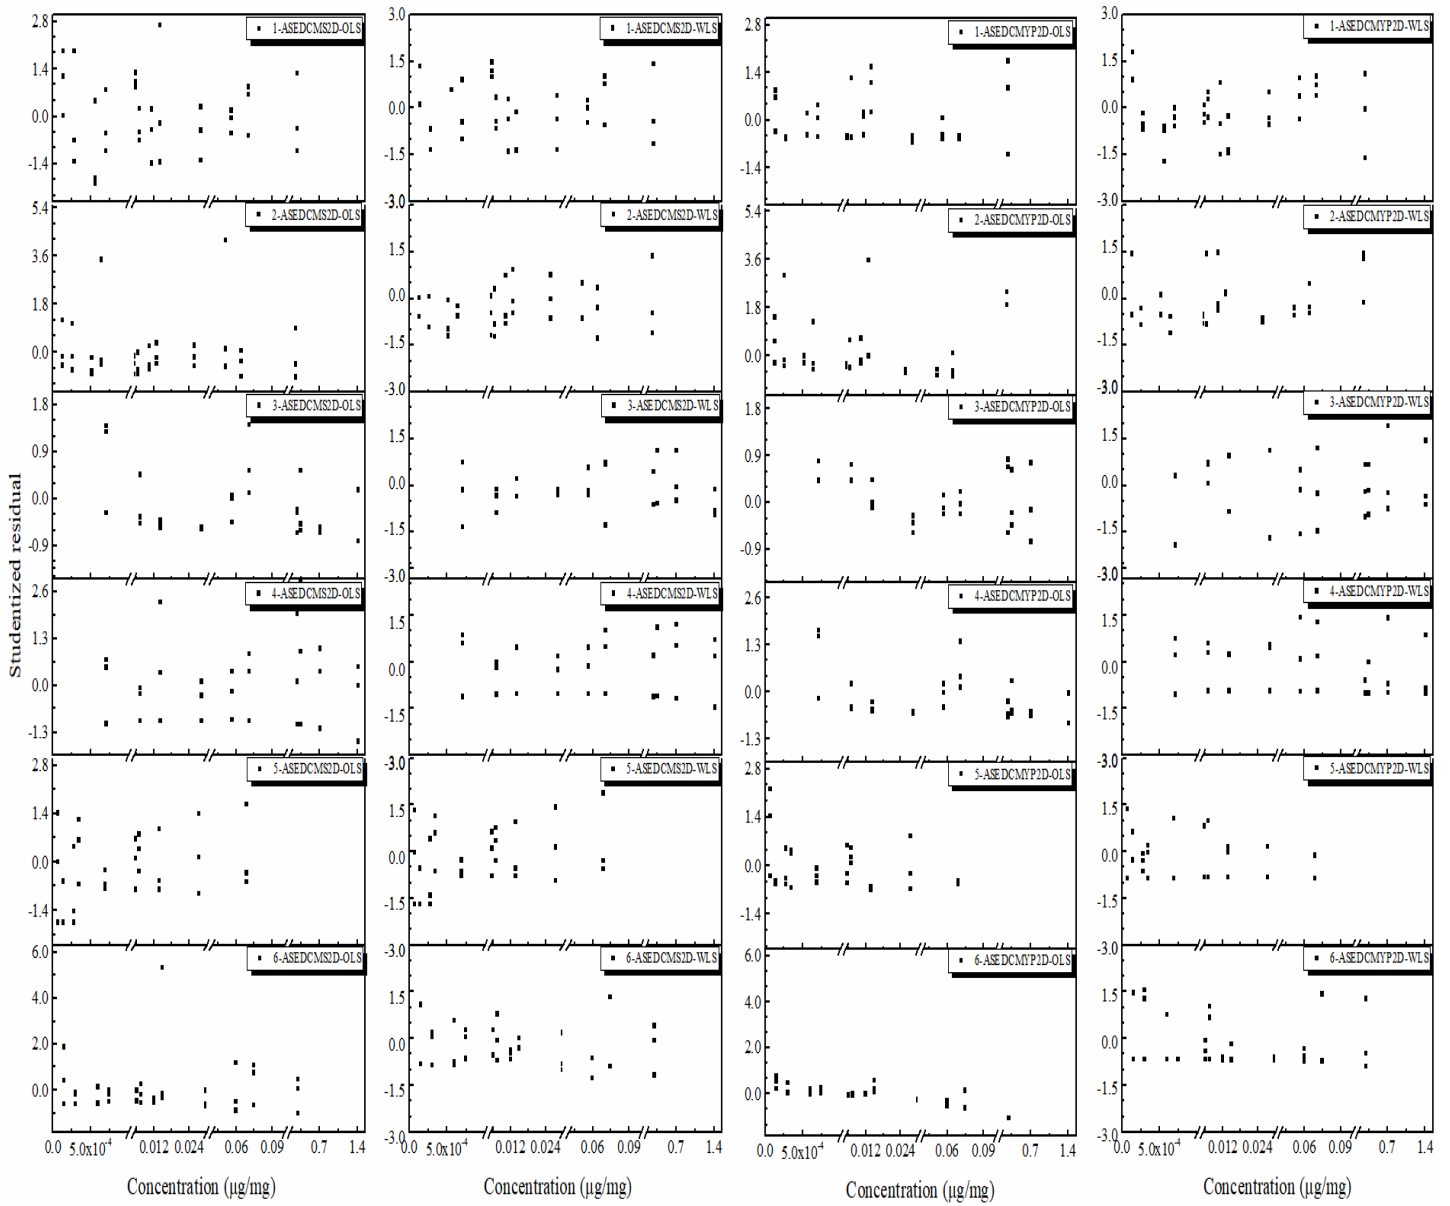

28 ■ 1-6 denote as beany odor markers 1-hexanal, 3-methyl-1-butanol, 1-hexanol, (3Z)-hexen-1-ol, 1-nonanal, and 2-

29 ethyl-1-hexanol, respectively.

30 Fig. S3 Residual plots of six beany odor makers in two deodorized matrix-matched flours via

31 ordinary least square (OLS) and weighted least square (WLS) regression.

32

Table S1. Literature investigation on beany odor quantification in pea cultivars

| Literature reported | Compound  |                    |           |                 |           |                   | Pea details                                 | Processing                         | Quantification methods                    |
|---------------------|-----------|--------------------|-----------|-----------------|-----------|-------------------|---------------------------------------------|------------------------------------|-------------------------------------------|
|                     | 1-hexanal | 3-methyl-1-butanol | 1-hexanol | (3Z)-hexen-1-ol | 1-nonanal | 2-ethyl-1-hexanol |                                             |                                    |                                           |
| 1                   | √         | √                  | √         | √               | √         |                   | Commercial green pea (GP)                   | Unblanched GP                      | No                                        |
| 2                   |           | √                  | √         | √               |           |                   | GP grown at Richmond, N.S.W.                | Blanched GP                        | No                                        |
| 3                   | √         | √                  | √         | √               | √         |                   | GP variety <i>medullare</i> Alef in Denmark | Blanched GP                        | Semi-quantification with IS               |
| 4                   | √         |                    |           |                 |           |                   | 6 YP, 3 GP cultivars in Saskatchewan        | Crop years 2005-2007               | Ratio of relative peak area               |
| 5                   | √         | √                  | √         | √               | √         |                   | Commercial pea flour                        | SAFE/SPME extraction               | Semi-quantification with IS               |
| 6                   | √         | √                  | √         | √               | √         |                   | Commercial YP                               | Germination from 1 to 6 days       | Calibration curves in deodorized starch   |
| 7                   | √         |                    | √         |                 | √         |                   | YP Zhong-wan variety                        | Crop year 2017, raw and roasted YP | Calibration curves in deodorized YP flour |
| 8                   | √         | √                  | √         |                 | √         | √                 | YP Agassize and Trapeze cultiar             | Crop year 2018                     | Ratio of relative peak area               |
| 9                   | √         | √                  | √         | √               | √         | √                 | Commercial YP                               | Different milling configurations   | Calibration curves in deodorized YP flour |

34 √ indicates the compound has been reported in literature.

35 GP: green pea, YP: yellow pea, IS: internal standard, SAFE: solvent assisted flavor evaporation; SPME: solid phase microextraction.

36

37 Table S2. Preparation of beany odor mixed stock solutions and corresponding dilution factors

|                        |                    | Concentration of each beany odor standard in mixed SS/ mg/mL                            |                    |           |                 |           |                   |
|------------------------|--------------------|-----------------------------------------------------------------------------------------|--------------------|-----------|-----------------|-----------|-------------------|
| Compound               |                    | 1-hexanal                                                                               | 3-methyl-1-butanol | 1-hexanol | (3Z)-hexen-1-ol | 1-nonanal | 2-ethyl-1-butanol |
| Weight/g               |                    | 0.1063                                                                                  | 0.0977             | 0.1076    | 0.1020          | 0.1045    | 0.1134            |
| Methanol/mL            |                    | 10                                                                                      | 10                 | 10        | 10              | 10        | 10                |
| SS <sup>1</sup> /mg/mL |                    | 10.63                                                                                   | 9.77               | 10.76     | 10.2            | 10.45     | 11.34             |
| Code                   | DF <sup>2</sup>    | Concentration of each beany odor standard in diluted mixed solutions / $\mu\text{g/mL}$ |                    |           |                 |           |                   |
| B25                    | $2.50 \times 10^3$ | 0.45                                                                                    | 0.41               | 2.27      | 0.43            | 0.22      | 0.48              |
| B50                    | $5.00 \times 10^3$ | 0.22                                                                                    | 0.21               | 1.13      | 0.22            | 0.11      | 0.24              |
| D                      | $1.00 \times 10^4$ | 0.11                                                                                    | 0.10               | 0.57      | 0.11            | 0.06      | 0.12              |
| A50                    | $1.25 \times 10^4$ | 0.09                                                                                    | 0.08               | 0.45      | 0.08            | 0.04      | 0.10              |
| C25                    | $2.50 \times 10^4$ | 0.05                                                                                    | 0.04               | 0.23      | 0.04            | 0.02      | 0.05              |
| C50                    | $5.00 \times 10^4$ | 0.02                                                                                    | 0.02               | 0.11      | 0.02            | 0.01      | 0.02              |
| B2525                  | $6.25 \times 10^4$ | 0.018                                                                                   | 0.016              | 0.091     | 0.017           | 0.009     | 0.019             |
| E                      | $1.00 \times 10^5$ | 0.011                                                                                   | 0.010              | 0.057     | 0.011           | 0.006     | 0.012             |
| B5025                  | $1.25 \times 10^5$ | 0.009                                                                                   | 0.008              | 0.045     | 0.009           | 0.004     | 0.010             |
| D25                    | $2.50 \times 10^5$ | 0.004                                                                                   | 0.004              | 0.023     | 0.004           | 0.002     | 0.005             |
| D50                    | $5.00 \times 10^5$ | 0.002                                                                                   | 0.002              | 0.011     | 0.002           | 0.001     | 0.002             |
| F                      | $1.00 \times 10^6$ | 0.001                                                                                   | 0.001              | 0.006     | 0.001           | 0.0006    | 0.001             |
| C5025                  | $1.25 \times 10^6$ | 0.0009                                                                                  | 0.0008             | 0.0045    | 0.0009          | 0.0004    | 0.0010            |
| E25                    | $2.50 \times 10^6$ | 0.0005                                                                                  | 0.0004             | 0.0023    | 0.0004          | 0.0002    | 0.0005            |
| E50                    | $1.25 \times 10^8$ | 0.0002                                                                                  | 0.0002             | 0.0011    | 0.0002          | 0.0001    | 0.0002            |

38 1. SS represents stock solution in methanol.

39 2. DF represents dilution factor, diluted with methanol.

40

41

Table S3. Serial dilutions of beany odor mixed stock solutions

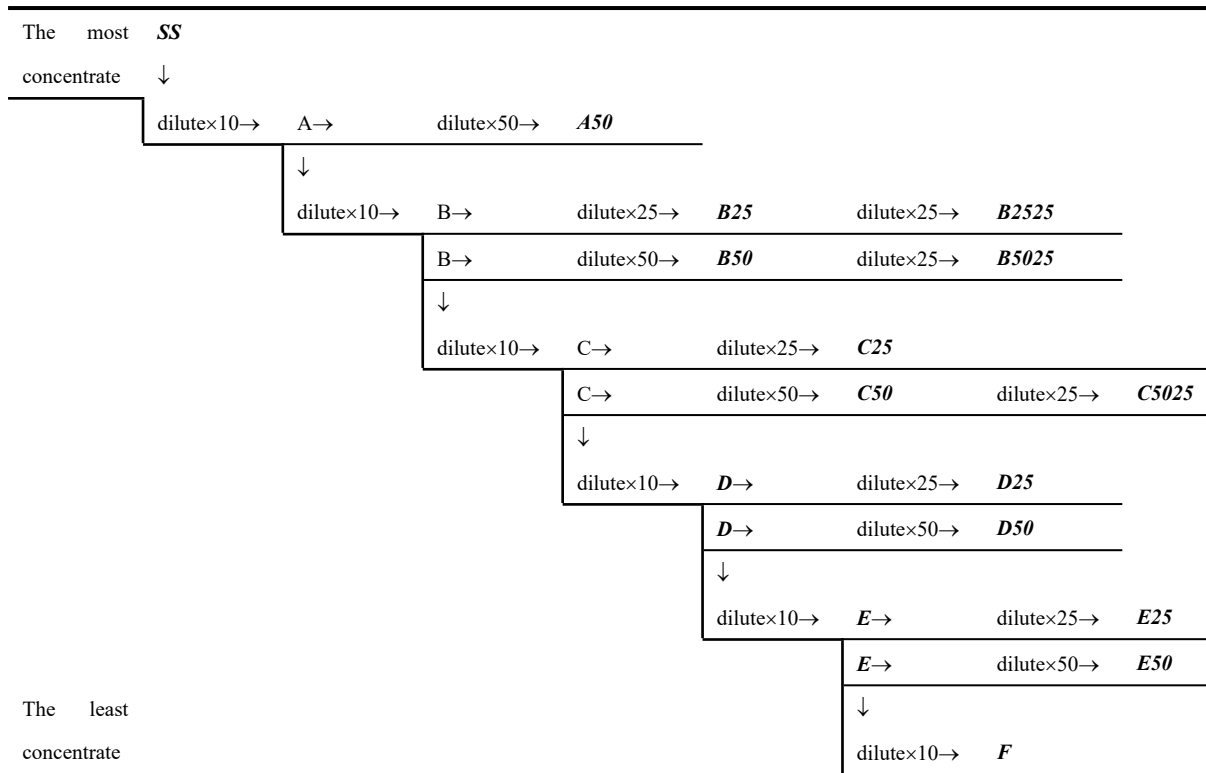

42 The codes and concentrations are corresponding to those in Table S2.

43



## 44 **2. Material and methods**

### 45 2.3 Physical attributes of deodorized matrix-matched flours

#### 46 2.3.1 Surface morphology

47 Surface morphology of deodorized matrix-matched flour from different treatment  
48 combinations were observed via JEOL JSM-6300 Scanning Electron Microscope (SEM, JEOL  
49 USA, Peabody, MA USA)<sup>9</sup>. The flour samples were adhered to aluminum mounts by carbon  
50 tabs and coated with gold using a Balzers SCD 030 sputter coater (BAL-TEC RMC, Tucson,  
51 AZ USA). Images were taken at × 1000 magnification with an accelerating voltage of 15 kV.

#### 52 2.3.2 Particle size distribution

53 Particle size distribution (PSD) of deodorized matrix-matched flour from different  
54 treatment combinations were determined by a laser light scattering instrument (Mastersizer  
55 3000, Malvern Instruments Ltd., Malvern, U.K.) in dry powder sampling module<sup>9</sup>. The particle  
56 size was determined from intensity–time fluctuations of the laser light scattered from a sample  
57 at a fixed angle of 173°. Measurements were reported as the volume-weight mean diameter ( $D$   
58 <sub>[4,3]</sub> =  $\sum n_i d_i^4 / \sum n_i d_i^3$ ), where  $n_i$  was the number of particles of diameter  $d_i$ .

### 59 2.4 Beany odor analysis

#### 60 2.4.1 beany odor detection

61 The beany odor detection and identification were achieved by headspace-solid phase  
62 microextraction-gas chromatography-mass spectrometry (HS-SPME-GC-MS, 7890B GC  
63 system, 5977A mass detector, Agilent Technologies, Santa Clara, CA, USA.) under scanning  
64 and selective ion mode (SIM) according to previous study with minor modifications<sup>9</sup>.

65 A SPME fiber coated with DVB/CAR/PDMS (50/30  $\mu\text{m}$ , Supelco Inc. Bellefonte, PA)  
66 was applied to extract the volatile compounds. PAL RSI 120 autosampler (CTC Analytics,  
67 Zwingen, Switzerland) was employed for the incubation and extraction procedure. An aliquot  
68 of 0.5 g YP flour mixed with 2 mL of deionized water was transferred in a 20 mL glass vial  
69 capped by aluminum caps with PTFE/silicone septa (diam.  $\times$  thickness 20 mm  $\times$  0.105 in,  
70 MilliporeSigma, St. Louis, MO, USA). Vials were incubated for 5 min at 60  $^{\circ}\text{C}$  in an  
71 autosampler heating block, while agitating at 250 rpm. Thereafter, the SPME fiber needle was  
72 inserted into the vial for 60 min to adsorb volatiles at 60  $^{\circ}\text{C}$ , which was then transferred into  
73 the injector port (250  $^{\circ}\text{C}$ ) for 3 min desorption.

74 The separation of volatiles was performed on an Agilent Technologies 7890B GC system.  
75 The injection port was operated in splitless mode. The liner was Agilent 5190-2293: 900  $\mu\text{L}$   
76 (Splitless, single taper, Ultra Inert) and the purge flow to split vent was 50 mL/min at 1 min.  
77 Volatiles were separated on a J&W DB-Wax column (60 m  $\times$  0.25 mm i.d., 0.25  $\mu\text{m}$  film  
78 thickness, Agilent Technologies, Santa Clara, CA, USA.). Oven temperature program was set  
79 as: initial temperature 40  $^{\circ}\text{C}$ , followed by an increase of 45  $^{\circ}\text{C}/\text{min}$  to 85  $^{\circ}\text{C}$ , then by 3  $^{\circ}\text{C}/\text{min}$   
80 to 135  $^{\circ}\text{C}$  and held for 1 min, next by 1  $^{\circ}\text{C}/\text{min}$  to 160  $^{\circ}\text{C}$  and held for 1 min, afterwards by 9  
81  $^{\circ}\text{C}/\text{min}$  to 200  $^{\circ}\text{C}$ , and lastly by 45  $^{\circ}\text{C}/\text{min}$  to 250  $^{\circ}\text{C}$  and held for 12 min. Helium carrier gas  
82 (purity 99.9999%, Praxair, Fargo, ND, USA.) was used at a flow rate of 2 mL/min. The column  
83 effluent was transferred to the 5977A mass detector, operated in electron impact (EI) ionization  
84 mode at 70 eV. The temperature of MS detector transfer line was hold at 250  $^{\circ}\text{C}$ . The MS  
85 quadrupole temperature was 150  $^{\circ}\text{C}$ . Ion source temperature was 230  $^{\circ}\text{C}$ . Scanning and  
86 selecting ion monitoring mode (SIM) was applied with scan time and segments setting from 4

87 to 63 min and scanning  $m/z$  from 40 to 350.

#### 88 2.4.2 Identification of beany odor markers

89 The beany odor markers were identified by three methods: i) raw data acquired by GC–  
90 MS were analyzed using Agilent MassHunter Qualitative Analysis (B.07.00) coupled with MS  
91 library NIST 17. The min match score > 85 was the main criteria applied for validating the  
92 entities; ii) to calculate the retention index (RI) of each compound using a series of n-alkanes  
93 C8–C40 (MilliporeSigma, St. Louis, MO, USA). Calculated RI was matched with a reference  
94 value according to NIST database (<https://webbook.nist.gov>); and iii) standard chemical  
95 compounds were applied to further verify the compounds under the aforementioned GC–MS  
96 conditions.

97 The retention time (RT) around 9.5 min with a SIM quantifier ion of 56.1 was assigned to  
98 1-hexanal (9.5 min-56.1  $m/z$ , **1**). The remaining beany odor makers were: 15.1 min-55.1  $m/z$  (**2**),  
99 15.3 min-43  $m/z$  (**3**), 16.1 min-41  $m/z$  (**4**), 16.6 min-56.1  $m/z$  (**5**), 19.6 min-57.1  $m/z$  (**6**), and 12.3  
100 min-85  $m/z$  (**IS**), respectively. The detailed information regarding SIM ions parameters is listed  
101 below.

| Time/min | Group name           | Number of ions | Mass1/dwell time/s | Mass2/dwell time/s | Mass3/dwell time/s |
|----------|----------------------|----------------|--------------------|--------------------|--------------------|
| 9.5      | Hexanal              | 3              | 41.00/50           | 44.10/50           | 56.10*/50          |
| 12.3     | 2-Methyl-3-heptanone | 3              | 57.00/50           | 85.00*/50          | 128.00/50          |
| 15.1     | 3-Methyl-1-butanol   | 3              | 42.00/50           | 55.10*/50          | 70.10/50           |
| 15.3     | 1-Hexanol            | 3              | 43.00/50           | 55.10/50           | 56.10/50           |
| 16.1     | (3Z)-Hexen-1-ol      | 3              | 41.00*/50          | 67.00/50           | 82.10/50           |
| 16.6     | Nonanal              | 3              | 41.00*/50          | 56.10/50           | 57.10/50           |

---

|      |                    |   |          |          |           |
|------|--------------------|---|----------|----------|-----------|
| 19.6 | 2-Methyl-1-hexanol | 3 | 41.00/50 | 43.00/50 | 57.10*/50 |
|------|--------------------|---|----------|----------|-----------|

---

102 \* represented quantitative SIM ion.

### 103 **3. Results and discussion**

#### 104 **3.4 Visual Evaluation of Linearity of Calibration Curves**

105 As displayed in Fig. S3, there were strong evidence of heteroskedasticity in the response  
106 of each beany odor marker via OLSR in both deodorized matrix-matched flours as the  
107 distribution was neither placed randomly alongside zero, nor shown an increasing behavior of  
108 the deviations. Similar residual plot results were also reported by Gomes et al. in pesticides  
109 quantitation by ESC method<sup>10</sup>.

110 Outliers were vastly detected in compound **1, 2, 4, 5, 6** in ASEDCMS2D matrix, whereas  
111 they were only noticed in compound **2** and **6** in ASEDCMYP2D matrix. After removing the  
112 outliers, the studentized residual by WLSR showed a more discrete and random distribution,  
113 especially in ASEDCMYP2D matrix. Take compound **3** as an example, the residual  
114 distribution was completely dispersed alongside the concentration, and each replicate was  
115 almost discrete from each other in ASEDCMYP2D matrix when regressed by WLSR.  
116 Conversely, it showed a declined trend and later fanned out in ASEDCMYP2D matrix with  
117 OLSR. Besides that, there seemed to be an interesting phenomenon that the residual  
118 distribution patterns of each beany odor marker were more random in ASEDCMYP2D matrix  
119 than in ASEDCMS2D matrix with the same WLSR, in which certain distribution patterns of  
120 the latter still showed a bit fan-out trend such as compound **5**.

#### 121 **3.6 Beany Odor Compounds Quantitation**

122

123

124

125 Taking hexanal in ASEDCMYP2D as an example,

| $A_i^{56.1}$ | $A_{IS}^{85}$ | $A_i^{56.1}/A_{IS}^{85}$ | $m_i^{56.1}/m_{IS}^{85}$ | $m_i^{56.1}$ -ASEDCMYP/ug | $m_i^{56.1}$ -ASEDCMYP/ug/g | Mean | STD  |
|--------------|---------------|--------------------------|--------------------------|---------------------------|-----------------------------|------|------|
| 2520.64      | 259.74        | 9.70                     | 0.23                     | 0.37                      | 0.75                        | 1.11 | 0.51 |
| 3193.58      | 188.80        | 16.92                    | 0.46                     | 0.74                      | 1.47                        |      |      |

126

127  $A_i^{56.1}$  was the response peak area of SIM ion 56.1 of hexanal reading from the TIC;

128  $A_{IS}^{85}$  was the response peak area of SIM ion 85 of internal standard reading from the TIC;

129  $m_i^{56.1}/m_{IS}^{85}$  was interpolated according to the calibration curve  $A_i^{56.1}/A_{IS}^{85} = 31.648 m_i^{56.1}/m_{IS}^{85} + 2.331$ ;

130  $m_i^{56.1}$ -ASEDCMYP/ug was achieved by multiple the mass of added IS, which was 1.598  $\mu$ g;

131  $m_i^{56.1}$ -ASEDCMYP/ug/g was achieved by dividing the applied sample mass of 0.5 g.

132 The final quantitative results were reported by mean  $\pm$  std.

133 Taking hexanal in ASEDCMS2D as an example,

| $A_i^{56.1}$ | $A_{IS}^{85}$ | $A_i^{56.1}/A_{IS}^{85}$ | $m_i^{56.1}/m_{IS}^{85}$ | $m_i^{56.1}$ -ASEDCMS/ug | $m_i^{56.1}$ -ASEDCMS/ug/g | Mean | STD  |
|--------------|---------------|--------------------------|--------------------------|--------------------------|----------------------------|------|------|
| 2697.71      | 495.20        | 5.45                     | 0.50                     | 0.79                     | 1.59                       | 1.47 | 0.17 |
| 2575.21      | 526.4         | 4.892                    | 0.42                     | 0.67                     | 1.35                       |      |      |

134  $m_i^{56.1}/m_{IS}^{85}$  was interpolated according to the calibration curve  $A_i^{56.1}/A_{IS}^{85} = 7.159 m_i^{56.1}/m_{IS}^{85} + 1.872$ ;

135

136

137

## References:

- 138 1. Shipton, J.; Whitfield, F. B.; Last, J. H., Extraction of volatile compounds from green  
139 peas (*Pisum sativum*). *Journal of Agricultural and Food Chemistry* **1969**, *17*, 1113-1118.
- 140 2. Murray, K. E.; Shipton, J.; Whitfield, F. B.; Last, J. H., The volatiles of off-flavoured  
141 unblanched green peas (*Pisum sativum*). *Journal of the Science of Food and Agriculture* **1976**,  
142 *27*, 1093-1107.
- 143 3. Jakobsen, H. B.; Hansen, M.; Christensen, M. R.; Brockhoff, P. B.; Olsen, C. E.,  
144 Aroma Volatiles of Blanched Green Peas (*Pisum sativum* L.). *Journal of Agricultural and Food*  
145 *Chemistry* **1998**, *46*, 3727-3734.
- 146 4. Azarnia, S.; Boye, J. I.; Warkentin, T.; Malcolmson, L.; Sabik, H.; Bellido, A. S.,  
147 Volatile flavour profile changes in selected field pea cultivars as affected by crop year and  
148 processing. *Food Chemistry* **2011**, *124*, 326-335.
- 149 5. Murat, C.; Gourrat, K.; Jerosch, H.; Cayot, N., Analytical comparison and sensory  
150 representativity of SAFE, SPME, and Purge and Trap extracts of volatile compounds from pea  
151 flour. *Food Chemistry* **2012**, *135*, 913-920.
- 152 6. Xu, M.; Jin, Z.; Lan, Y.; Rao, J.; Chen, B., HS-SPME-GC-MS/olfactometry combined  
153 with chemometrics to assess the impact of germination on flavor attributes of chickpea, lentil,  
154 and yellow pea flours. *Food Chemistry* **2019**, *280*, 83-95.
- 155 7. Bi, S.; Xu, X.; Luo, D.; Lao, F.; Pang, X.; Shen, Q.; Hu, X.; Wu, J., Characterization  
156 of Key Aroma Compounds in Raw and Roasted Peas (*Pisum sativum* L.) by Application of  
157 Instrumental and Sensory Techniques. *Journal of Agricultural and Food Chemistry* **2020**, *68*,  
158 2718-2727.
- 159 8. Cui, L.; Kimmel, J.; Zhou, L.; Rao, J.; Chen, B., Identification of extraction pH and  
160 cultivar associated aromatic compound changes in spray dried pea protein isolate using  
161 untargeted and targeted metabolomic approaches. *Journal of Agriculture and Food Research*  
162 **2020**, *2*, 100032.
- 163 9. Gu, Z.; Jiang, H.; Zha, F.; Manthey, F.; Rao, J.; Chen, B., Toward a comprehensive  
164 understanding of ultracentrifugal milling on the physicochemical properties and aromatic  
165 profile of yellow pea flour. *Food Chemistry* **2021**, *345*, 128760.
- 166 10. H. d. O. Gomes, R. d. S. Cardoso, J. G. M. da Costa, V. P. Andrade da Silva, C. d. A.  
167 Nobre, R. N. Pereira Teixeira and R. F. do Nascimento, Statistical evaluation of analytical  
168 curves for quantification of pesticides in bananas, *Food Chemistry* **2021**, *345*, 128768.

169

170

171
